1 **Full Title: Changes in the prevalence of the common risk factors for non-communicable**  
2 **diseases in Uganda between 2014 and 2023: Informed by nationally**  
3 **representative cross-sectional surveys.**

4 **Short title: Prevalence of the common risk factors for non-communicable diseases**

5 Ronald Kusolo<sup>1</sup>, Gerald Mutungi<sup>2</sup>, Mary Mbuliro<sup>1</sup>, Richard Kajjura<sup>3</sup>, Ronald Wesonga<sup>4</sup>, Silver  
6 K. Bahendeka<sup>5,6</sup>, David Guwatudde<sup>1</sup>.

7

8 1. Department of Epidemiology and Biostatistics, School of Public Health, Makerere  
9 University, Kampala, Uganda.

10 2. Department of Non-Communicable Diseases, Ministry of Health, Kampala, Uganda.

11 3. Department of Community Health and Behavioral Sciences, School of Public Health,  
12 Makerere University, Kampala, Uganda.

13 4. Department of Statistics, College of Science, Sultan Qaboos University, Muscat, Sultanate  
14 of Oman.

15 5. Department of Internal Medicine, School of Medicine Uganda Martyrs' University, Nkozi,  
16 Uganda.

17 6. Department of Diabetes & Endocrinology, St. Francis Hospital, Nsambya, Kampala,  
18 Uganda.

19

## 20 **ABSTRACT**

21 **Background:** Non-communicable diseases (NCDs) remain the biggest contributor to global  
22 mortality. Although communicable diseases still contribute highest to mortality in the African  
23 region, the proportion contributed by NCDs continues to rise. An important way to control  
24 NCDs is to focus on reducing the prevalence of the common NCD risk factors. As such,  
25 NOTE: This preprint reports new research that has not been certified by peer review and should not be used to guide clinical practice.

25 monitoring changes in the prevalence of these risk factors is essential for better NCD  
26 prevention planning. Uganda conducted its first nationally representative NCD risk factor  
27 survey in 2014, and a second in 2023. We analyzed the prevalence of the common NCD risk  
28 factors using data from the two surveys to identify which risk factors changed between 2014  
29 and 2023.

30 **Methods:** Both surveys drew countrywide samples stratified by the four regions of the  
31 country, and by rural-urban locations. The World Health Organization's STEPs tool was used  
32 to collect data on demographic and behavioral characteristics, and physical and biochemical  
33 measurements. We defined and calculated weighted prevalence of the following common  
34 NCD risk factors: high blood pressure, high blood glucose, overweight and obesity, current  
35 use of alcohol, current tobacco use, inadequate consumption of fruits and vegetables,  
36 inadequate physical activity, and sedentariness.

37 **Results:** The 2014 survey enrolled a total of 3906 participants, whereas that of 2023 enrolled  
38 3694 participants. The NCD risk factor prevalences that increased significantly were: high  
39 blood glucose from 1.3% in 2014, to 2.9% in 2023 ( $p < 0.001$ ); overweight and obesity from  
40 19.4% in 2014 to 24.1% in 2023 ( $p < 0.001$ ); current alcohol consumption from 28.5% in 2014,  
41 to 31.1% in 2023 ( $p = 0.013$ ); and sedentariness from 26.6% in 2014, to 31.9% in 2023 ( $p <$   
42  $0.001$ ). It is only the prevalence of current smoke tobacco use that decreased significantly  
43 from 9.6% in 2014, to 8.3% in 2023 ( $p = 0.046$ ). Nationally, no significant changes were  
44 observed in the prevalence of high blood pressure, inadequate consumption of fruits and  
45 vegetables, and inadequate physical activity.

46 **Conclusions:** Most of the common NCD risk factors increased between 2014 and 2023. There  
47 is an agent need for the various stakeholders in Uganda to implement interventions targeting

48 reduction in the prevalence of NCD risk factors to prevent the currently increasing burden of  
49 NCDs and associated mortality.

50

51 **Key words:** Non-communicable disease risk factors; WHO STEPS methodology; Uganda;  
52 Nationally Representative Survey; NCD Surveillance; Africa.

53

## 54 **INTRODUCTION**

55 Non-communicable diseases (NCDs), mainly cardiovascular diseases (heart disease and  
56 stroke), cancer, diabetes, chronic respiratory diseases, and poor mental health, kill  
57 approximately 41 million people each year, equivalent to 74% of all deaths globally. Of these,  
58 17 million are premature deaths that occur before the age of 70 years; and 86% of these occur  
59 in low- and middle-income countries (LMIC) [1]. Thus NCDs are the greatest contributor to  
60 global mortality.

61

62 Although at a lower rate, the rates of NCD associated-mortality are increasing in the sub-  
63 Saharan Africa (SSA) region. Currently, the proportion of mortality in the African region due  
64 to NCDs ranges from 36% to 88%. Cardiovascular diseases, cancers, diabetes mellitus and  
65 chronic respiratory diseases account for over 70% of NCD-related mortality [2].

66

67 An important way to control NCDs is to focus on reducing the prevalence of risk factors  
68 associated with these diseases [1]. Surveillance, or regular monitoring of the common risk  
69 factors for NCDs is essential in public health to inform decision making for prevention and  
70 control of NCDs. The common NCD risk factors for include behavioral risk factors including  
71 physical inactivity, alcohol consumption, tobacco use, low consumption of fruits and

72 vegetables, and sedentariness; and physiological/ metabolic risk factors that include  
73 overweight and obesity, high blood pressure, hyperglycemia (high blood glucose levels), and  
74 hyperlipidemia (high levels of fat in the blood) [1]. A number of LMICs have now conducted  
75 nationally representative population based surveys that collect data on the common risk  
76 factors for NCDs, mostly using the WHO STEPS methodology [3]. Findings from these surveys  
77 can be used not only to monitor the prevalence of the common NCD risk factors, but to also  
78 evaluate the effectiveness of any interventions that may have been implemented.

79

80 Uganda conducted its first nationally representative NCD risk factor survey in 2014 [4, 5], and  
81 a second recently in 2023. Since 2014 Uganda’s Ministry of Health has spearheaded a number  
82 of public health preventive initiatives aimed at reducing the general public’s risk for NCDs. But  
83 it is not known if there have been improvements in the prevalence of the common NCD risk  
84 factors. Of interest is to monitor changes in the risk factors for better NCD prevention  
85 planning. We analyzed the prevalence of the common NCD risk factors using data from the  
86 Uganda NCD risk factor survey conducted in 2014, and that conducted in 2023. The primary  
87 objective of our analysis was to assess any changes, and to identify which NCD risk factors  
88 changed between 2014 and 2023.

89

## 90 **MATERIALS AND METHODS**

### 91 **Study Design**

92 A cross-sectional study design was used to conduct both the 2014 and the 2023 surveys. The  
93 2014 survey was conducted between March and July 2014, whereas the 2023 survey was  
94 conducted between February and April 2023.

### 95 **Sample Size**

96 The sample size for the survey was calculated assuming a 50% prevalence of the risk factors  
97 ( $P= 0.5$ , which is the recommended value for unknown prevalence, and gives the most  
98 conservative sample size), a 5% level of significance ( $\alpha=0.05$ ), a margin of error of 0.05  
99 ( $\delta=0.05$ ); an expected response rate of 80%, six age-sex categories (18-29, 30-45, 45-69), and  
100 a 1.5 design effect. Using these parameters, the sample size calculation was made using the  
101 WHO STEPS sample size calculator [6]. The calculated sample size was a total of 4322.

## 102 **Study Population & sampling**

103 Uganda currently has a total population of approximately 45.8 million [7], of which  
104 approximately 45% are adults aged 18 years or older. Both surveys covered the whole  
105 country, and three stage stratified sampling was used as described below. We used  
106 population enumeration areas (EAs) information that was provided by the Uganda Bureau of  
107 Statistics (UBOS). UBOS demarcated the whole country into a total of 78,691 EAs that they  
108 used for the Uganda Population and Housing Census of 2014. The strata were regions  
109 stratified by urban-rural locations, that is, regions (Northern, Western, Central & Eastern),  
110 then by urban and rural location within each region, generating a total of 8 strata. The first  
111 stage of selecting the study sample was a random sample of 350 enumeration areas (EA) in  
112 2014, and 310 in 2023 from the 8 strata using proportion to size sampling (PPS), as the first  
113 stage of sampling. Research Assistants (RA) that had received a five-day training were then  
114 dispatched throughout the country to list all households within the sampled EAs. The listing  
115 was used to conduct the second stage of sample selection by randomly selecting 14  
116 households within each EA.

117

118 A different team (Interviewers), who had also received a five-day training on procedures and  
119 administration of the STEPs tool was then dispatched throughout the country. They started

120 by enumerating all eligible members the sampled households and recorded these in an  
121 electronic tablet. The final third stage of sample selection involved randomly selecting one  
122 eligible household member within each household, which was conducted by the study  
123 Interviewers using an android tablet that was pre-set to randomly select one individual from  
124 the list of household members for inclusion in the survey, leading to a total sample of 4900  
125 2014, and 4322 in 2023. Sample selection was conducted without replacement, thus there  
126 was no replacement of the android tablet pre-selected household member to prevent  
127 potential selection bias.

128

129 Eligible participants were adults aged between 18-69 years of age, had been members of their  
130 household for at least six months preceding the date of the survey, of sound mind, and able  
131 to give written informed consent. Household members with the following characteristics  
132 were excluded: unable to stand without support (e.g., after limb amputation without a  
133 prosthesis), clearly under the influence of alcohol or other drug(s) abuse, and moribund and  
134 obtundent.

135

### 136 **Measurements**

137 Both surveys used the World Health Organization's (WHO) STEPwise approach to surveillance,  
138 a standardized method of analyzing risk factors for NCDs [3]. The STEPwise approach is a  
139 sequential process starting with collecting data on key risk factors using a questionnaire (STEP  
140 1), followed by physical measurements (STEP 2), and finally collection of biological samples  
141 for biochemical assessments (STEP 3).

142 In STEP 1, data was collected on demographic and behavioral information using the STEPS  
143 questionnaire [8]. This step collected information on the demographic and social

144 characteristics (e.g. age, sex, level of education, employment, income, etc); behavioral  
145 characteristics (e.g. tobacco use, alcohol consumption, fruit and vegetable consumption,  
146 physical inactivity, etc). It also included information on health history like history of raised  
147 blood pressure, raised blood glucose, raised blood cholesterol, cardiovascular diseases,  
148 lifestyle advice and cervical cancer screening for women respondents, household energy use,  
149 mental health (depression) and impact of the COVID-19 pandemic on behavioral risk factors.  
150 STEP 2 involved making the physical measurements including height, weight, girth (waist, hip),  
151 blood pressure and pulse, which were made immediately after administering the  
152 questionnaire. Three blood pressure readings were taken 3–5 minutes apart. After  
153 administering the questionnaire and making the physical measurements, Interviewers  
154 requested participants to converge at pre-arranged location the following morning so that a  
155 blood and urine sample could be obtained to conduct the biochemical measurements.  
156 Participants were requested to fast from food and drinks for at least 8 h overnight, and not  
157 to indulge in exercise or smoking in the morning prior to the measurements as described in  
158 more details elsewhere [9].

159 STEP 3 was conducted on day two and involved performing biochemical measurements using  
160 point of care devices to measure fasting plasma glucose. blood glucose, blood lipids (total  
161 cholesterol and High-Density Lipoprotein cholesterol), and spot urine sodium, creatinine and  
162 cotinine testing.

163

## 164 **Ethics**

165 The 2023 the survey was approved by the Institutional Review Committee of Nsambya  
166 Hospital, Kampala, Uganda (Approval #: SFHN-2022-43), and the 2014 survey was approved  
167 by the same IRB (Approval #: IRC/PRJ/11/13/031). Written informed consent was obtained

168 from eligible subjects before enrollment in the study. Participants with at least two systolic  
169 blood pressure readings of at least 121 mm Hg, and/or diastolic blood pressure of at least  
170 81mm Hg, and/or with fasting plasma glucose of at least 6.1 mmol/L, and were not already  
171 on treatment for hypertension and/or diabetes, were advised to as soon as possible report  
172 to the nearest government owned health facility for further evaluation.

173

## 174 **Data management & Analysis**

### 175 *Data management*

176 The STEPS data collection tool was programmed using Open Data Kit (ODK), an open-source  
177 data collection platform. All data was collected through a password protected tablet to ensure  
178 confidentiality and encrypted during transmission from the Interviewers to the server to  
179 protect data from unauthorized access. Data quality indicators were monitored through a  
180 real-time dashboard by the data manager. All the identified quality issues were discussed with  
181 the field team for timely resolution. The final cleaned datasets were then merged and locked  
182 for analysis.

183

### 184 *Statistical Analysis Methods*

185 The response rate was calculated as the proportion of eligible household members who  
186 consented to participate in the survey, out of the total number of sampled households.  
187 Descriptive statistics are reported as means with corresponding standard deviations for the  
188 study continuous variables. Categorical variables, including sex, urban-rural status and region  
189 of residence, level of education, marital status, and employment status are reported as  
190 frequencies and proportions.

191



192 The prevalence of the common NCD risk factors are reported by region, and by urban- rural  
193 location (urbancity), comparing their prevalence between the 2014 and the 2023 surveys.  
194 Below is a detailed description of how the prevalence of the risk factors were calculated.

195 The Behavioral Risk Factors included:

196 i) The prevalence of current alcohol use was calculated as the percentage of participants  
197 reporting to had consumed any amount and type of alcohol in the past 30 days  
198 preceding the day of the interview.

199 ii) The prevalence of current tobacco use was calculated using three different indicators.  
200 The first was prevalence of current use of all forms of tobacco, calculated as the  
201 percentage of participants reporting to had used smoke and/or smokeless tobacco in  
202 the past 30 days, including smoking, chewing, and/or sniffing. The second indicator  
203 was prevalence of current smoke tobacco use, calculated as the percentage of  
204 participants reporting to had used smoke tobacco in the past 30 days. The third  
205 indicator was the percentage of participants who tested positive to the  
206 Cotinine/Nicotine test (COT200).

207 iii) The prevalence of inadequate consumption of fruits and vegetables was calculated  
208 as the percentage of participants reporting to had consumed an average of less than  
209 five servings of fruits and/or vegetables combined per day, over the past seven days  
210 preceding the day of interview.

211 iv) The prevalence of sedentariness was calculated as the percentage of participants  
212 reporting an average of more than four hours of awake time, seated, reclined or  
213 lying posture. The cut-off of four hours was based on a study that showed that more  
214 than four hours of sedentary increased the risk of all-cause, cardiovascular and  
215 cancer mortality, and incident type 2 diabetes [10].

216 v) The prevalence of inadequate physical activity was calculated as the percentage of  
217 participants reporting less than 150 minutes per week of moderate intensity physical  
218 activity, and/or less than 75 minutes per week of vigorous intensity physical activity,  
219 per recommendations by the World Health Organization (WHO) [11].

220

221 The Physiological/ Metabolic Risk Factors included:

222 i) The prevalence of high blood pressure calculated as the percentage of participants  
223 with an average two readings of systolic blood pressure  $\geq 140$ , and/or an average of  
224 two readings of diastolic blood pressure  $\geq 90$  mmHg [12, 13], and/or reporting to be  
225 currently on hypertension treatment.

226 ii) The prevalence of high blood sugar was calculated as the percentage of participants  
227 with a fasting plasma glucose reading of  $> 7.0$  millimoles per liter (mmol/L), or reporting  
228 to be currently on anti-diabetes treatment [14].

229 iii) The prevalence of overweight and obesity was calculated as a Body Mass Index  
230 greater than 25. BMI for a participant was calculated as weight in kilograms per  
231 squared meter ( $\text{kg}/\text{m}^2$ ) [15].

232

233 We report weighted prevalence estimates using the study sampling weights. Three distinct  
234 weight levels were applied in calculating the prevalence of the above risk factors. Step 1  
235 weights were used for the self-reported behavioral risk factors including: prevalence of  
236 current alcohol use, prevalence of current tobacco use (except cotinine/ nicotine test),  
237 prevalence of inadequate consumption of fruits and vegetables, prevalence of sedentariness,  
238 and prevalence of inadequate physical activity. Step 2 weights were applied in calculating the

239 prevalence of physiological/ metabolic NCD risk factors, including prevalence of high blood  
240 pressure, prevalence of high blood sugar, and the prevalence of overweight and obesity.

241 Step 3 weights were applied in calculating prevalence of current tobacco use as measured by  
242 Cotinine/Nicotine detection (COT200).

243

244 Chi-square tests were applied to assess statistical differences in the prevalence of the NCD  
245 risk factors between the 2014, and the 2023 surveys, with a significance level at 5%. Data  
246 analysis was conducted using the STATA software version 15.

247

## 248 **RESULTS**

### 249 **Response rates in the 2023 Survey**

250 A total of 4340 households were approached to participate in the 2023 NCD Risk Factors  
251 STEPS survey, from which one randomly selected eligible adult was requested to consent to  
252 participate in the survey. A total of 3694 (1426 men; 2268 women) consented to participate,  
253 giving a response rate of 85.1%. The distribution of response rates by region and urbanity are  
254 shown in Table 1. For the 2014 survey, out of the 4900 nationwide sampled subjects, 3987  
255 consented to participate in the survey, giving a response rate of 81.4% [4, 5].

256

257 Table 1: Distribution of Response Rate by Region

| <b>Region &amp; urbanity</b> |       | <b>Number of<br/>Households selected</b> | <b>Number of<br/>Households Realized</b> | <b>Response Rate<br/>(%)</b> |
|------------------------------|-------|------------------------------------------|------------------------------------------|------------------------------|
| Central                      | Urban | 476                                      | 357                                      | 75.0                         |
|                              | Rural | 616                                      | 547                                      | 88.8                         |

| Region & urbanity |       | Number of Households selected | Number of Households Realized | Response Rate (%) |
|-------------------|-------|-------------------------------|-------------------------------|-------------------|
| Eastern           | Urban | 210                           | 194                           | 92.3              |
|                   | Rural | 1008                          | 897                           | 89.0              |
| Northern          | Urban | 126                           | 104                           | 82.5              |
|                   | Rural | 826                           | 706                           | 85.5              |
| Western           | Urban | 224                           | 186                           | 83.0              |
|                   | Rural | 854                           | 742                           | 86.9              |
| <b>Total</b>      | -     | <b>4,340</b>                  | <b>3,694</b>                  | <b>85.1</b>       |

258

### 259 **Characteristics of the participants**

260 Of the 3694 participants in the 2023 NCD Risk Factors STEPS survey, 2268 (61.4%) were  
 261 female, 2,892 (78.3%) were rural residents, 1,560 (42.2%) were aged between 40 years and  
 262 above, and 968 (26.2%) had attained at least primary school education. By region of  
 263 residence, 810 (21.9%) were from the northern region, 904 (24.5%) from central, 1,052  
 264 (28.5%) from eastern, and 928 (25.1%) from the western region. The average age of  
 265 participants was 38.3 (SD=13.8). A summary of selected characteristics of the participants is  
 266 presented in Table 2. Characteristics of participants in the 2014 survey have previously been  
 267 reported elsewhere [4, 5].

268

269 **Table 2: Participant characteristics**

| Characteristic      |                      | -n-   | (%)        |
|---------------------|----------------------|-------|------------|
| All participants    | -                    | 3,694 | 100%       |
| Sex:                | Males                | 1,426 | 38.6       |
|                     | Females              | 2,268 | 61.4       |
| Urban-rural:        | Rural                | 2,892 | 78.3       |
|                     | Urban                | 802   | 21.7       |
| Region:             | Northern             | 810   | 21.9       |
|                     | Central              | 904   | 24.5       |
|                     | Eastern              | 1,052 | 28.5       |
|                     | Western              | 928   | 25.1       |
| Age in years:       | 18-19                | 186   | 5.0        |
|                     | 20-29                | 1,033 | 28.0       |
|                     | 30-39                | 915   | 24.8       |
|                     | ≥40                  | 1,560 | 42.2       |
|                     | Mean ± SD            | 3,694 | 38.3 ±13.8 |
| Level of education: | None                 | 2,122 | 57.4       |
|                     | Primary sch          | 968   | 26.2       |
|                     | Secondary sch        | 463   | 12.5       |
|                     | University or higher | 140   | 3.9        |
|                     | Not stated           | 1     | 0          |
| Marital status:     | Never married        | 455   | 12.3       |

| Characteristic     |                   | -n-   | (%)  |
|--------------------|-------------------|-------|------|
|                    | Currently married | 2,033 | 55.0 |
|                    | Separated         | 414   | 11.2 |
|                    | Divorced          | 38    | 1.0  |
|                    | Widowed           | 268   | 7.3  |
|                    | Cohabiting        | 485   | 13.1 |
|                    | Refused           | 1     | 0    |
| Employment status: | Employed          | 2941  | 79.6 |
|                    | Non-paid          | 177   | 4.8  |
|                    | Student           | 64    | 1.7  |
|                    | Unemployed        | 511   | 13.8 |
|                    | Refused           | 1     | 0    |

270

271

272 **Prevalence of the common NCD risk factors**

273 Our analysis showed no overall significant change in the prevalence of high blood pressure between  
 274 the 2014 survey at 24.3%, and that in the 2023 survey at 24.5% (p=0.838); neither were there  
 275 significant changes between the two surveys in the four regions of the country (Table 3), nor by  
 276 urbancity (Table 4).

277

278 There was an overall significant increase in the prevalence of high blood glucose from 1.3% in 2014,  
 279 to 2.9% in 2023 ((p< 0.001). Significant increases between the 2014 survey and the 2023 survey were

280 observed in all regions of the country, except in the Northern region ( $p=0.735$ ) - Table 3. Significant  
281 increases in the prevalence of high blood glucose were also observed in rural areas from 1.1% in 2014  
282 to 2.8% in 2023 ( $p< 0.001$ ). No significant changes were observed in urban areas between the two  
283 surveys – Table 4.

284

285 There was an overall significant increase in the prevalence of overweight and obesity, from 19.4% in  
286 2014 to 24.1% in 2023 ( $p< 0.001$ ). The significant increase was observed in three regions of the  
287 country, except the Eastern region ( $p= 0.163$ ). There was also a significant increase the prevalence of  
288 overweight and obesity in rural areas from 16.3% in 2014 to 19.9% in 2023 ( $p< 0.001$ ). No significant  
289 changes were observed in urban areas.

290

291 The prevalence of current alcohol consumption increased significantly from 28.5% in 2014, to 31.1%  
292 in 2023 ( $p=0.013$ ). The significant increases occurred in all regions of the country except the Central  
293 region ( $p= 0.149$ ) – Table 3. Significant increases in the prevalence of current alcohol consumption  
294 were also observed in both rural and rural areas between the 2014 survey and the 2023 survey (Table  
295 4).

296

297 There was an overall significant degree in the prevalence of current smoke tobacco use from 9.6% in  
298 2014, to 8.3% in 2023 ( $p= 0.046$ ). This significant decrease occurred in the Western region of the  
299 country only from 11.6% in 2014, to 8.1% in 2023 ( $p= 0.011$ ), Table 3. No significant differences were  
300 observed in the prevalence of smoke tobacco use in urban, or rural areas (Table 4).

301

302 Regarding current use of all forms of tobacco, overall, no significant differences between 2014 and  
303 2023, only a marginal significant decrease was observed in the Western region from 12.0% in 2014, to  
304 9.1% in 2023 ( $p= 0.041$ ). No significant differences were observed in the prevalence of all forms of  
305 tobacco use in urban, or in rural areas (Table 4).

306

307 The overall prevalence of a positive cotinine/ nicotine test was 13.6%. This test was conducted during  
308 the 2023 survey only.

309

310 Overall, there was no change in the prevalence of inadequate consumption of fruits and vegetables,  
311 at 87.8% in 2014 and 86.4% in 2023 ( $p= 0.067$ ). However, we observed a significant decrease in the  
312 prevalence of inadequate consumption of fruits and vegetables in the Eastern region from 91.7% in  
313 2014, to 83.8% in 2023 ( $p< 0.001$ ); whereas a significant decrease was observed in the Eastern region  
314 from 75.1% in 2014 to 82.5% in 2023. No significant changes were observed in the prevalence of  
315 inadequate consumption of fruits and vegetables in urban, or in rural areas (Table 4).

316

317 The prevalence of inadequate physical activity remained low at 4.4% in 2014 and 3.6% in 2023, but  
318 overall there were no significant changes between the two surveys ( $p= 0.074$ ). However, we observed  
319 significant decrease between the two surveys in the prevalence of inadequate physical activity the  
320 Northern region from 3.9% in 2014 to 1.5% in 2023 ( $p= 0.003$ ), and in the Central region from 6.7% I  
321 2014 to 4.4% in 2023 ( $p= 0.023$ ) (Table 3). A significant decrease in the prevalence of inadequate  
322 physical activity was also observed in rural areas from 3.5% in 2014 to 2.3% in 2023 ( $p=0.007$ ) (Table  
323 4).

324

325 The prevalence of sedentariness significantly increased overall from 26.6% in 2014, to 31.9% in 2023  
326 ( $p< 0.001$ ). The significant increases occurred in all regions of the country except the Eastern region  
327 ( $p= 0.226$ ) – Table 3. Significant increases were also observed in rural areas, from 24.7% 2014, to 31.9%  
328 2023 survey ( $p< 0.001$ ) (Table 4).

329

330



331 **Table 3: Prevalence of the common NCD Risk Factors by Region.**

| Risk factor                                                             | Northern |       | Central |       | Eastern |       | Western |       | Overall |       |
|-------------------------------------------------------------------------|----------|-------|---------|-------|---------|-------|---------|-------|---------|-------|
|                                                                         | 2014     | 2023  | 2014    | 2023  | 2014    | 2023  | 2014    | 2023  | 2014    | 2023  |
| High blood pressure                                                     | 19.1%    | 19.6% | 27.7%   | 27.5% | 26.2%   | 27.3% | 23.3%   | 21.6% | 24.3%   | 24.5% |
|                                                                         | 0.801    |       | 0.918   |       | 0.577   |       | 0.377   |       | 0.838   |       |
| High blood glucose                                                      | 1.3%     | 1.5%  | 1.5%    | 4.2%  | 0.9%    | 2.7%  | 1.4%    | 2.8%  | 1.3%    | 2.9%  |
|                                                                         | 0.735    |       | <0.001  |       | 0.003   |       | 0.034   |       | <0.001  |       |
| Overweight and obesity                                                  | 8.3%     | 14.6% | 30.2%   | 36.8% | 16.9%   | 18.9% | 19.2%   | 23.8% | 19.4%   | 23.9% |
|                                                                         | <0.001   |       | 0.001   |       | 0.242   |       | 0.015   |       | <0.001  |       |
| Current alcohol use                                                     | 36.9%    | 41.1% | 28.9%   | 26.1% | 20.8%   | 26.4% | 28.2%   | 34.8% | 28.5%   | 31.1% |
|                                                                         | 0.086    |       | 0.149   |       | 0.003   |       | 0.002   |       | 0.013   |       |
| Current tobacco use, based on the cotinine/nicotine blood test (COT200) | -        | 22.0% | -       | 11.6% | -       | 9.4%  | -       | 14.9% |         | 13.6% |
|                                                                         |          |       |         |       |         |       |         |       |         |       |
| Smoke tobacco use                                                       | 14.1%    | 16.3% | 6.5%    | 5.5%  | 6.8%    | 6.3%  | 11.6%   | 8.1%  | 9.6%    | 8.3%  |
|                                                                         | 0.222    |       | 0.335   |       | 0.650   |       | 0.011   |       | 0.046   |       |
| All forms of current tobacco                                            | 19.6%    | 19.3% | 7.0%    | 6.7%  | 7.5%    | 8.3%  | 12.0%   | 9.1%  | 11.2%   | 10.1% |
|                                                                         | 0.879    |       | 0.785   |       | 0.506   |       | 0.041   |       | 0.119   |       |
| Less than 5 servings of fruit and veg/ day                              | 87.7%    | 85.2% | 91.7%   | 83.8% | 75.1%   | 82.5% | 94.9%   | 94.4% | 87.8%   | 86.4% |
|                                                                         | 0.146    |       | <0.001  |       | <0.001  |       | 0.630   |       | 0.067   |       |
| Inadequate physical activity levels                                     | 3.9%     | 1.5%  | 6.7%    | 4.4%  | 4.1%    | 4.4%  | 2.6%    | 3.2%  | 4.4%    | 3.6%  |
|                                                                         | 0.003    |       | 0.023   |       | 0.739   |       | 0.438   |       | 0.074   |       |
| Sedentariness                                                           | 27.5%    | 30.9% | 33.5%   | 38.9% | 29.8%   | 32.3% | 16.3%   | 25.1% | 26.6%   | 31.9% |
|                                                                         | 0.136    |       | 0.009   |       | 0.226   |       | <0.001  |       | <0.001  |       |

332 **NB: Figures below the prevalence rates are p-values comparing the prevalences**

333 **immediately above them**

334  
335

**Table 4: Prevalence of the common NCD Risk Factors by Urbancity.**

| Risk factor                                                              | Urban |       | Rural  |       | Total  |       |
|--------------------------------------------------------------------------|-------|-------|--------|-------|--------|-------|
|                                                                          | 2014  | 2023  | 2014   | 2023  | 2014   | 2023  |
| High blood pressure                                                      | 26.1% | 28.9% | 23.9%  | 22.6% | 24.3%  | 24.5% |
|                                                                          | 0.177 |       | 0.242  |       | 0.838  |       |
| High blood glucose                                                       | 2.0%  | 2.9%  | 1.1%   | 2.8%  | 1.3%   | 2.9%  |
|                                                                          | 0.205 |       | <0.001 |       | <0.001 |       |
| Overweight and obesity                                                   | 32.7% | 33.7% | 16.3%  | 19.7% | 19.4%  | 23.9% |
|                                                                          | 0.648 |       | <0.001 |       | <0.001 |       |
| Current alcohol use                                                      | 22.8% | 28.2% | 29.9%  | 32.4% | 28.5%  | 31.1% |
|                                                                          | 0.008 |       | 0.039  |       | 0.013  |       |
| Current tobacco use, based on the cotinine/ nicotine blood test (COT200) | -     | 10.2% | -      | 15.1% | -      | 13.6% |
| Current smoke tobacco use                                                | 6.2%  | 7.1%  | 10.4%  | 8.9%  | 9.6%   | 8.3%  |
|                                                                          | 0.436 |       | 0.053  |       | 0.046  |       |
| Current use of all forms of current tobacco                              | 6.7%  | 7.8%  | 12.2%  | 11.1% | 11.2%  | 10.1% |
|                                                                          | 0.359 |       | 0.192  |       | 0.119  |       |
| Inadequate consumption of fruits and vegetables                          | 89.4% | 86.5% | 87.4%  | 86.4% | 87.8%  | 86.4% |
|                                                                          | 0.054 |       | 0.259  |       | 0.067  |       |
| Inadequate physical activity                                             | 7.8%  | 6.5%  | 3.5%   | 2.3%  | 4.4%   | 3.6%  |
|                                                                          | 0.282 |       | 0.007  |       | 0.074  |       |
| Sedentariness                                                            | 34.6% | 34.4% | 24.7%  | 30.7% | 26.6%  | 31.9% |
|                                                                          | 0.928 |       | <0.001 |       | <0.001 |       |

336 **NB: Figures below the prevalence rates are p-values comparing the prevalences**  
 337 **immediately above them**

338  
339

340 Figures 1a and 1b show the overall prevalence of the NCD risk factors, comparing 2014 and  
 341 2023.

342

343 Figure 1a: Prevalence of behavioral risk factors in 2014 and in 2023

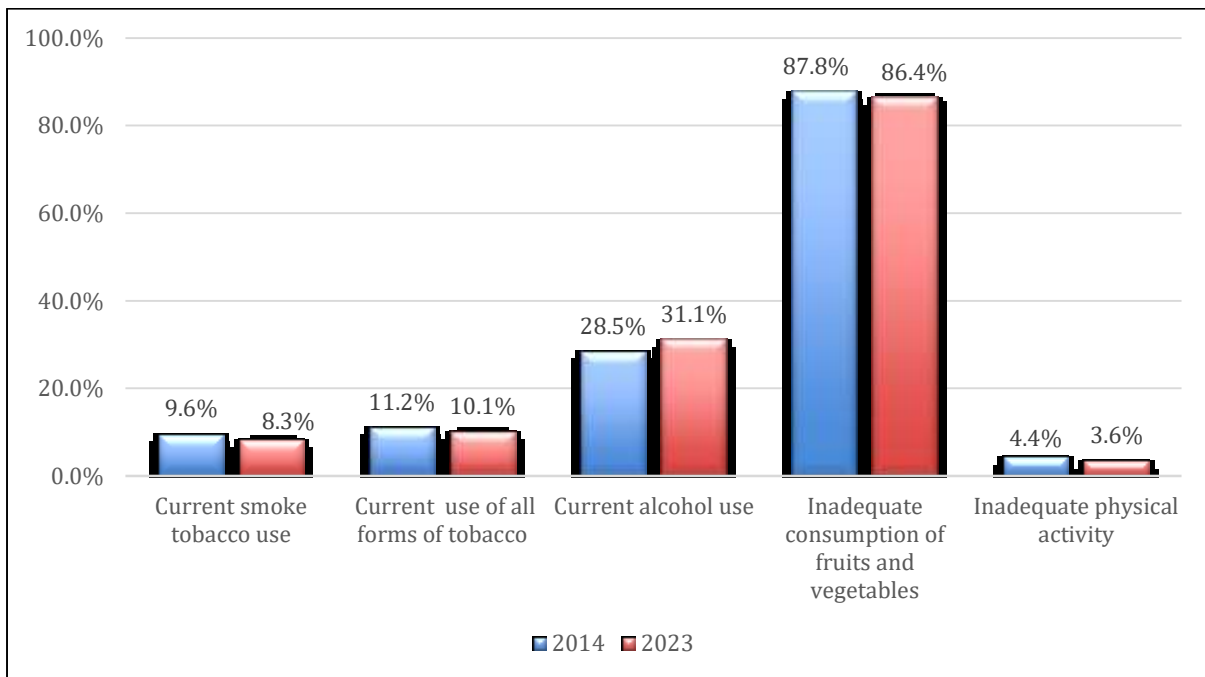

344

345

346

347 Figure 1b: Prevalence of physiological /metabolic risk factors in 2014 and in 2023

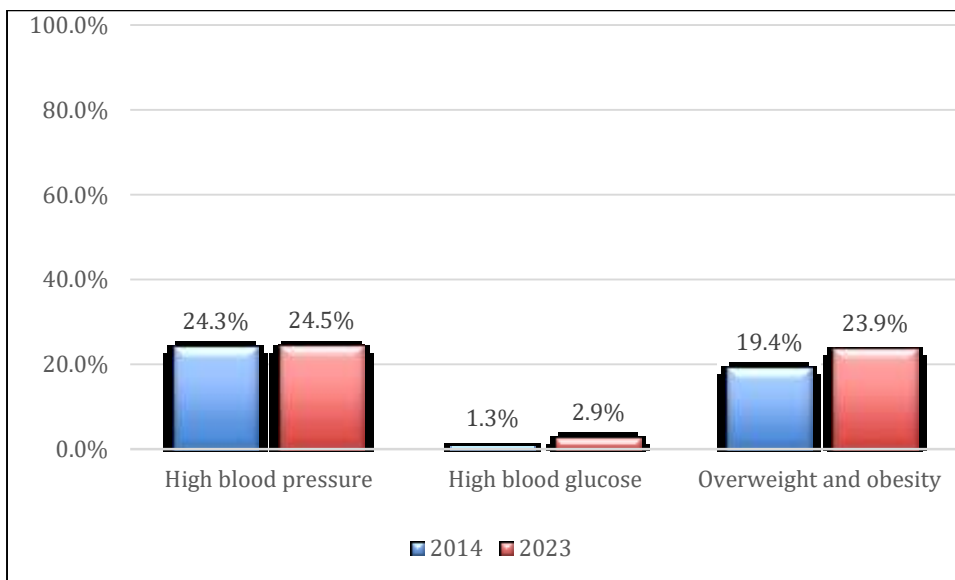

348

349

350

351

352

353

354

## 355 **DISCUSSION**

356 Our analysis reveals two important findings. First, the prevalence of most of the common NCD  
357 risk factors increased between 2014 and 2023, including: prevalence of high blood pressure,  
358 prevalence of overweight and obesity, prevalence of current alcohol consumption, and  
359 prevalence of sedentariness. Second, the prevalence of some of the risk factors remains  
360 unacceptably high including the prevalence of high blood pressure, being higher than 25%,  
361 and the prevalence inadequate consumption of fruits and vegetables, being higher than 80%.  
362 There is an agent need for the various stakeholders, including Uganda’s Ministry of Health, to  
363 identify and implement interventions aimed at reducing the prevalence NCD risk factors to  
364 prevent the currently increasing burden of NCDs and associated mortality that has been noted  
365 by the WHO Africa Regional Office [2]. NCDs threaten progress towards the 2030 Agenda for  
366 Sustainable Development Goals (SDG Target 3.4), which aim at reducing by one third by 2030  
367 premature mortality from NCDs through prevention, treatment and promotion of mental  
368 health and well-being [16]. Despite the availability of cost-effective and evidence-based  
369 practices to address NCDs in LMICs [17], implementing these interventions remains a  
370 significant challenge, particularly in promoting healthy behaviors [18]. Thus concerted effort  
371 is required.

372

### 373 **Strengths and Limitations**

374 An important strength of our analysis is that it is based on data collected from nationally  
375 representative sample surveys. Thus the prevalences reported represent a national picture.

376 Second, the two surveys used the standardized WHO STEPS methodology, a methodology that  
377 has been validated and used in many LMIC countries, which makes the data reliable and  
378 findings comparable.

379

380 A limitation to our analysis is in regard to the self-reported behavioral NCD risk factors  
381 including current alcohol consumption, current tobacco use, physical inactivity,  
382 sedentariness. Self-report of behavioral characteristics is likely to have some recall bias, a  
383 form information bias which may lead to either over or under-estimation, and it is always  
384 difficult to determine the direction of bias, if any.

385

386 **Author Contributions:** The authors contributed in the following ways: *Conceptualization:*  
387 SKB, DG & GNM; *Data curation:* RKusolo; *Formal Analysis:* MM, RKusolo & DG; *Funding*  
388 *Acquisition:* DG, GNM & SBK; *Investigation:* DG, SKB, GNM, RKusolo, RKajura & RW;  
389 *Methodology:* DG, SKB, RKusolo, RW; *Project Administration:* DG & SKB; *Resources:* DG & SKB;  
390 *Software:* RKusolo; *Supervision:* DG & SKB; *Validation:* DG, SKB, RW & RKusolo; *Visualization:*  
391 MM, RKusolo & DG; *Writing – Original Draft Preparation:* DG, RKusolo & MM; *Writing –*  
392 *Review & Editing:* DG, RKusolo, MM, SKB, RW, GNM & RKajura.

393

#### 394 **Acknowledgements**

395 The authors are grateful to the research participants who volunteered to participate in the  
396 NCD risk factors survey; and for the technical and administrative support provided by  
397 Uganda’s Ministry of Health, and that from the Uganda Bureau of Statistics. The authors also  
398 acknowledge the administrative support provided by the WHO Uganda Country Office  
399 through Hafisa Kasule and Christine Joan Karamagi. We also grateful for technical support

400 provided by: 1) Cheick Bady Diallo, Regional Advisor-Strategic Information and Surveillance,  
401 NCD Communicable and Non-communicable Diseases Cluster (UCN), WHO Regional Office for  
402 Africa, Cité Djoué, Brazzaville, Congo; 2) Stefan Savin, Technical Officer, Surveillance,  
403 Monitoring and Reporting, Non-communicable Diseases Department, World Health  
404 Organization, Geneva, Switzerland; and 3) Patricia Rarau, Technical Officer, Surveillance,  
405 Monitoring and Reporting Non-communicable Diseases Department, World Health  
406 Organization, Geneva, Switzerland. The conduct of the two surveys on which findings  
407 reported in this article are based was supported with funding from: the Uganda government,  
408 the World Health Organization, the World Diabetes Foundation, and, the United Nations  
409 Development Program.

410

#### 411 **References:**

- 412 [1] WHO. Non-Communicable Diseases, [https://www.who.int/news-room/fact-](https://www.who.int/news-room/fact-sheets/detail/noncommunicable-diseases#:~:text=NCDs threaten progress towards the,is closely linked with NCDs)  
413 [sheets/detail/noncommunicable-diseases#:~:text=NCDs threaten progress towards](https://www.who.int/news-room/fact-sheets/detail/noncommunicable-diseases#:~:text=NCDs threaten progress towards the,is closely linked with NCDs)  
414 [the,is closely linked with NCDs](https://www.who.int/news-room/fact-sheets/detail/noncommunicable-diseases#:~:text=NCDs threaten progress towards the,is closely linked with NCDs) (2023, accessed 8 August 2024).
- 415 [2] WHO AFRO. Communicable and Non-Communicable Diseases in Africa in 2021/22.  
416 *Who* 2023; 88.
- 417 [3] WHO. WHO | STEPwise approach to surveillance (STEPS). *WHO Website*,  
418 <http://www.who.int/chp/steps/en/> (2009, accessed 12 April 2015).
- 419 [4] Guwatudde D, Mutungi G, Wesonga R, et al. The Epidemiology of Hypertension in  
420 Uganda: Findings from the National Non-Communicable Diseases Risk Factor Survey.  
421 *PLoS One* 2015; 10: e0138991.
- 422 [5] Uganda Ministry of Health. *Non-Communicable Disease Risk Factor Baseline Survey,*  
423 *Uganda 2014 Report, Ministry of Health.* Kampala, Uganda, 2014.
- 424 [6] WHO. Noncommunicable Disease Surveillance, Monitoring and Reporting,  
425 [https://www.who.int/teams/noncommunicable-diseases/surveillance/systems-](https://www.who.int/teams/noncommunicable-diseases/surveillance/systems-tools/steps/planning-sampling)  
426 [tools/steps/planning-sampling](https://www.who.int/teams/noncommunicable-diseases/surveillance/systems-tools/steps/planning-sampling) (2017, accessed 13 August 2024).
- 427 [7] Uganda Bureau of Statistics. Home - Uganda Bureau of Statistics,  
428 <https://www.ubos.org/> (2024, accessed 13 August 2024).

- 429 [8] WHO. Noncommunicable Disease Surveillance, Monitoring and Reporting - Standard  
430 STEPS instrument. *WHO Website*, [https://www.who.int/teams/noncommunicable-](https://www.who.int/teams/noncommunicable-diseases/surveillance/systems-tools/steps/instrument)  
431 [diseases/surveillance/systems-tools/steps/instrument](https://www.who.int/teams/noncommunicable-diseases/surveillance/systems-tools/steps/instrument) (2020).
- 432 [9] Bahendeka S, Wesonga R, Mutungi G, et al. Prevalence and correlates of diabetes  
433 mellitus in Uganda: A population-based national survey. *Trop Med Int Health*. Epub  
434 ahead of print 4 January 2016. DOI: 10.1111/tmi.12663.
- 435 [10] Patterson R, McNamara E, Tainio M, et al. Sedentary behaviour and risk of all-cause,  
436 cardiovascular and cancer mortality, and incident type 2 diabetes: a systematic  
437 review and dose response meta-analysis. *Eur J Epidemiol* 2018; 33: 811–829.
- 438 [11] WHO. Global recommendations on physical activity for health. *WHO Website*,  
439 [http://whqlibdoc.who.int/publications/2010/9789241599979\\_eng.pdf](http://whqlibdoc.who.int/publications/2010/9789241599979_eng.pdf) (2010,  
440 accessed 21 July 2015).
- 441 [12] Whitworth JA. 2003 World Health Organization (WHO)/International Society of  
442 Hypertension (ISH) statement on management of hypertension. *J Hypertens* 2003; 21:  
443 1983–92.
- 444 [13] Chobanian A V, Bakris GL, Black HR, et al. The Seventh Report of the Joint National  
445 Committee on Prevention, Detection, Evaluation, and Treatment of High Blood  
446 Pressure: the JNC 7 report. *JAMA* 2003; 289: 2560–72.
- 447 [14] American Diabetes Association AD. Standards of medical care in diabetes-2015  
448 abridged for primary care providers. *Clin Diabetes* 2015; 33: 97–111.
- 449 [15] Expert Panel. Clinical guidelines on the identification, evaluation, and treatment of  
450 overweight and obesity in adults: executive summary. Expert Panel on the  
451 Identification, Evaluation, and Treatment of Overweight in Adults. *Am J Clin Nutr*  
452 2023; 68: 899–917.
- 453 [16] United Nations. Sustainable Development Goal, Target 3.4,  
454 [https://sdgs.un.org/goals/goal3#targets\\_and\\_indicators](https://sdgs.un.org/goals/goal3#targets_and_indicators) (2024, accessed 29 August  
455 2024).
- 456 [17] Niessen LW, Mohan D, Akuoku JK, et al. Tackling socioeconomic inequalities and non-  
457 communicable diseases in low-income and middle-income countries under the  
458 Sustainable Development agenda. *Lancet (London, England)* 2018; 391: 2036–2046.
- 459 [18] Allen LN, Wigley S, Holmer H. Implementation of non-communicable disease policies  
460 from 2015 to 2020: a geopolitical analysis of 194 countries. *Lancet Glob Heal* 2021; 9:  
461 e1528–e1538.
- 462

medRxiv preprint doi: <https://doi.org/10.1101/2024.09.04.24313080>; this version posted September 5, 2024. The copyright holder for this preprint (which was not certified by peer review) is the author/funder, who has granted medRxiv a license to display the preprint in perpetuity. It is made available under a [CC-BY 4.0 International license](https://creativecommons.org/licenses/by/4.0/).

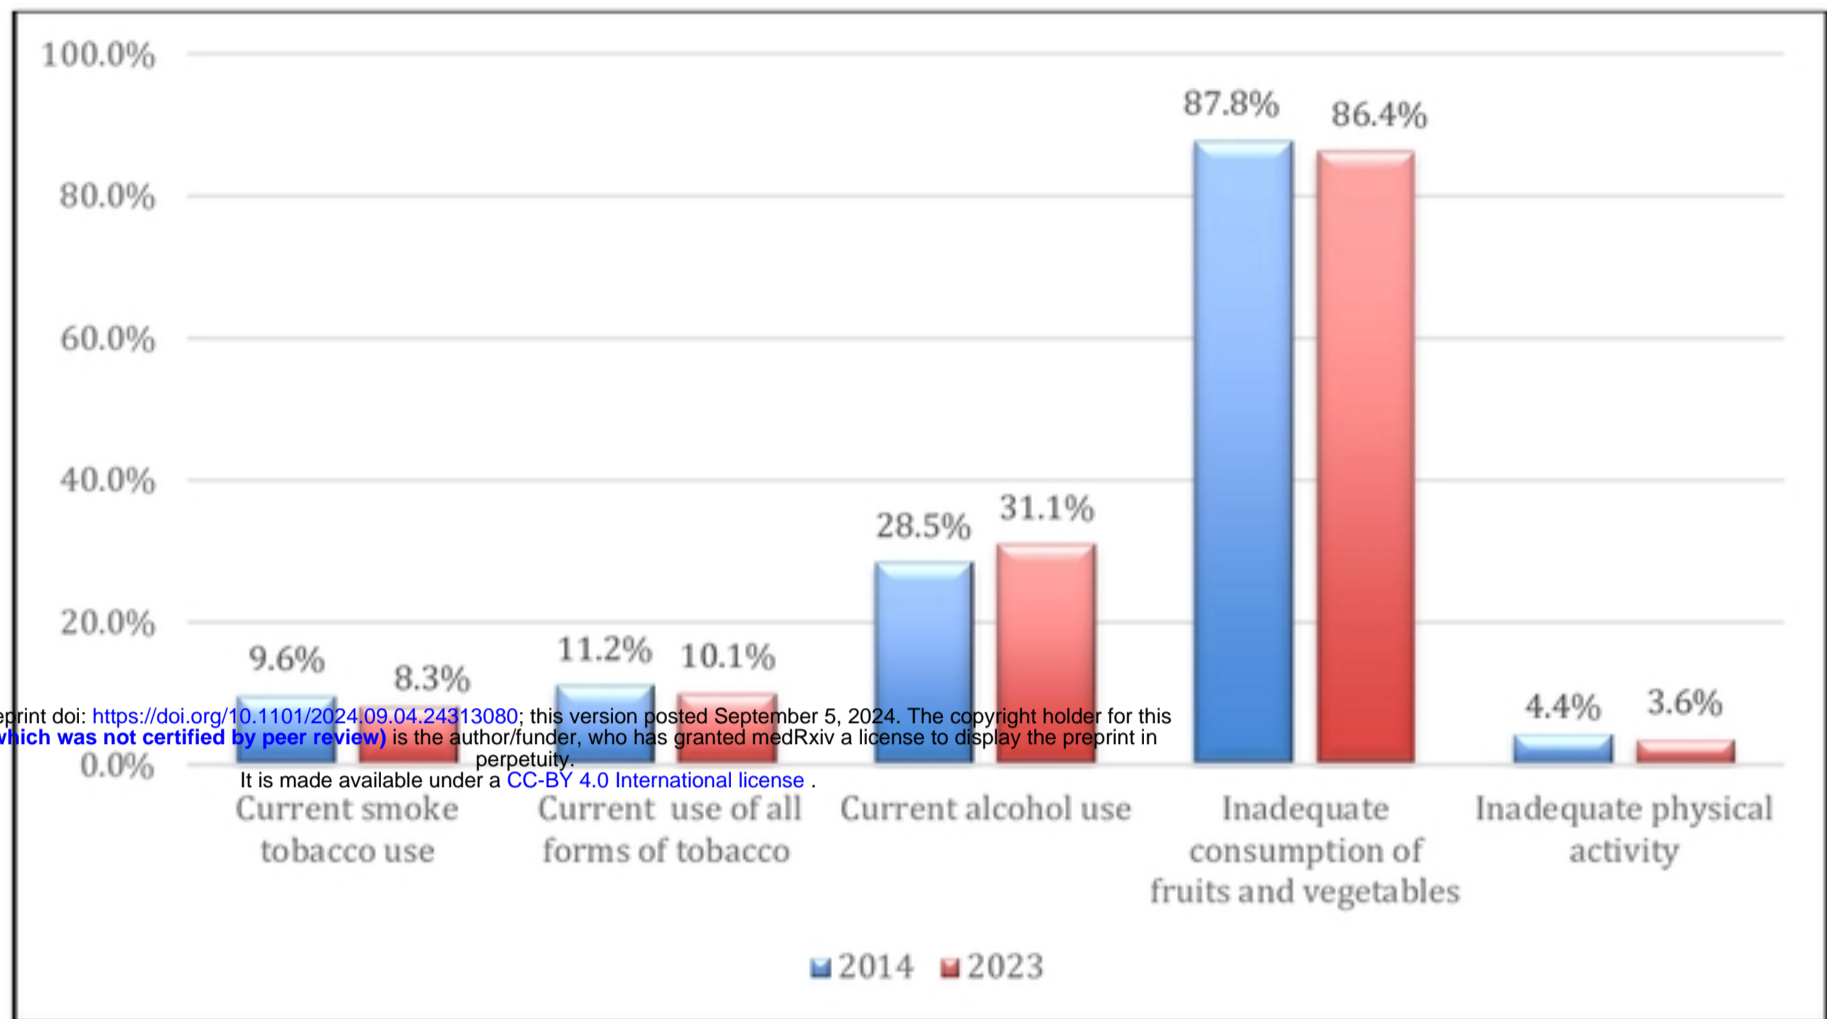

Figure 1



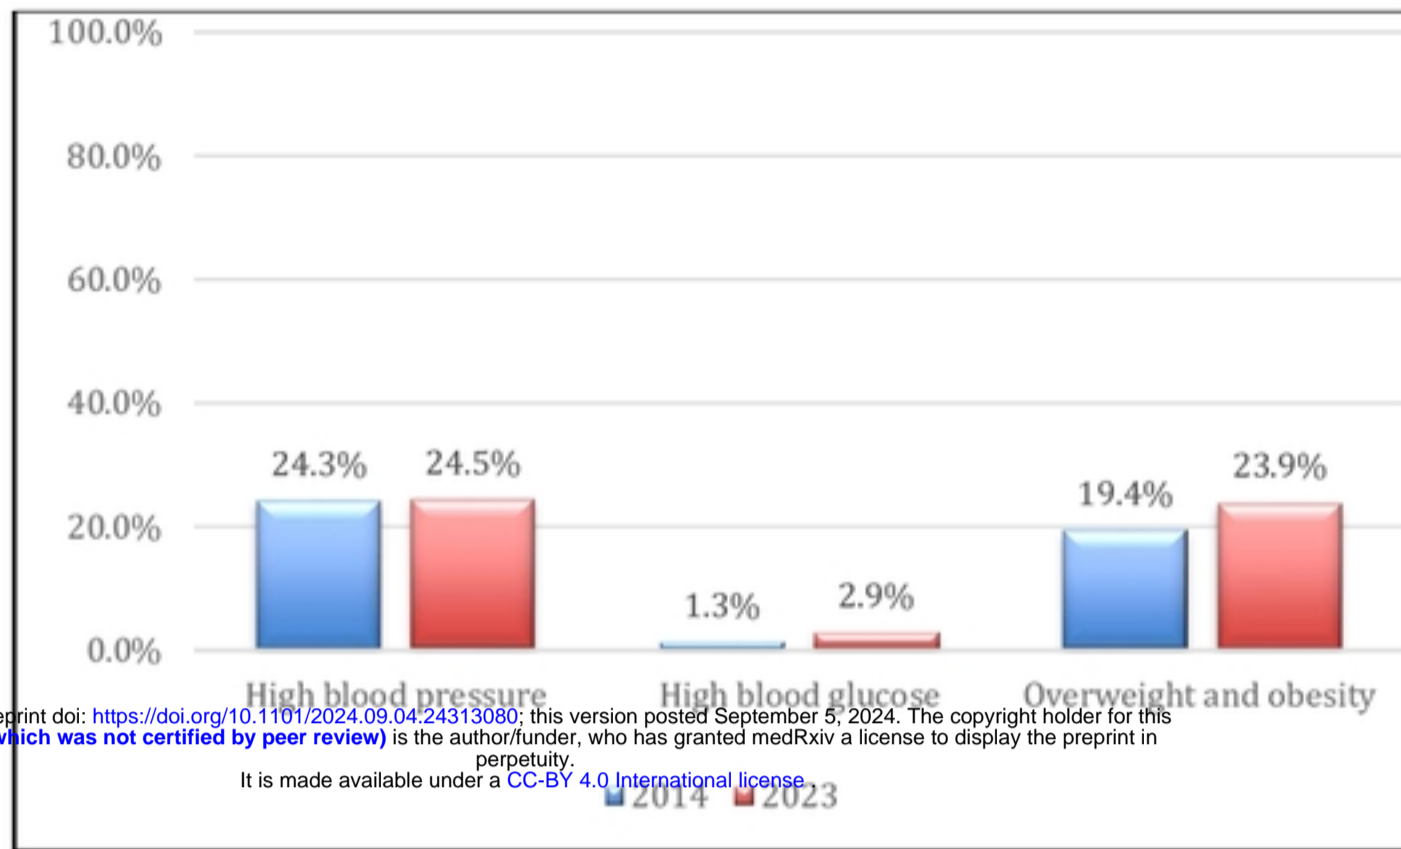

Figure 2
